# Supplementary material for: Die Bedeutung peripartaler mütterlicher Angst- und depressiver Störungen für die frühkindliche Entwicklung
Source: Atypon-hosted journal article supplement (doi:10.1026/0942-5403/a000382), 2022-07-01
Supplement: 0942-5403_a000382_esm1.pdf [file 0942-5403_a000382_esm1.pdf]

**Tabelle E 1.** Soziodemografische, schwangerschafts- und geburtsbezogene Angaben für die Stichproben zu T6 ( $N = 263$ ) und T7 ( $N = 249$ )

|                                      | <b>T6</b> |      | <b>T7</b> |      |
|--------------------------------------|-----------|------|-----------|------|
|                                      | <i>N</i>  | %    | <i>N</i>  | %    |
| <b>Monatliches Einkommen (Netto)</b> |           |      |           |      |
| weniger als 500 €                    | 18        | 6.9  | 18        | 7.2  |
| 500–1500 €                           | 90        | 34.2 | 84        | 33.7 |
| 1500–2500 €                          | 81        | 30.8 | 78        | 31.3 |
| 2500–3500 €                          | 49        | 18.6 | 46        | 18.5 |
| mehr als 3500 €                      | 25        | 9.5  | 23        | 9.2  |
| <b>Beschäftigungsstatus</b>          |           |      |           |      |
| arbeitslos                           | 22        | 8.4  | 22        | 8.8  |
| berufstätig                          | 154       | 58.5 | 144       | 57.8 |
| Hausfrau                             | 15        | 5.7  | 14        | 5.6  |
| Studentin                            | 56        | 21.3 | 55        | 22.1 |
| anderes                              | 16        | 6.1  | 14        | 5.6  |
| <b>Höchster Schulabschluss</b>       |           |      |           |      |
| kein Schulabschluss                  | 2         | 0.8  | 2         | 0.8  |
| Hauptschulabschluss                  | 13        | 4.9  | 13        | 5.2  |
| Realschulabschluss                   | 66        | 25.1 | 59        | 23.7 |
| Abitur/Fachabitur                    | 97        | 36.9 | 94        | 37.8 |
| (Fach-)Hochschulabschluss            | 85        | 32.3 | 81        | 32.5 |
| <b>Arbeitszeit</b>                   |           |      |           |      |
| Vollzeit                             | 106       | 40.3 | 100       | 40.2 |
| Teilzeit                             | 70        | 26.6 | 68        | 27.3 |
| zurzeit nicht berufstätig            | 87        | 33.1 | 81        | 32.5 |
| <b>Familienstand</b>                 |           |      |           |      |
| verheiratet                          | 97        | 36.9 | 94        | 37.8 |
| getrennt lebend                      | 4         | 1.5  | 3         | 1.2  |
| geschieden                           | 6         | 2.3  | 5         | 2.0  |
| niemals verheiratet                  | 156       | 59.3 | 147       | 59.0 |
| <b>Zusammenleben mit Partner</b>     |           |      |           |      |
| mit Ehepartner                       | 96        | 36.5 | 93        | 37.3 |
| mit festem Partner                   | 153       | 58.2 | 142       | 57.0 |
| <b>Bisherige Lebendgeburten</b>      |           |      |           |      |
| 0                                    | 121       | 46.0 | 113       | 45.5 |
| 1                                    | 139       | 52.9 | 135       | 54.2 |
| 2-4                                  | 3         | 1.1  | 1         | 0.4  |

**Fortsetzung Tabelle E 1**

|                              | <b>T6</b>       |      | <b>T7</b>       |      |
|------------------------------|-----------------|------|-----------------|------|
|                              | <i>N</i>        | %    | <i>N</i>        | %    |
| <b>Geschlecht des Kindes</b> |                 |      |                 |      |
| Junge                        | 132             | 50.2 | 128             | 51.4 |
| Mädchen                      | 131             | 49.8 | 121             | 48.6 |
| <b>Geburtsmodus</b>          |                 |      |                 |      |
| Spontangeburt                | 210             | 79.8 | 195             | 78.3 |
| Kaiserschnitt/vaginale OP    | 53              | 20.2 | 54              | 21.7 |
| <b>Vollendete SSW</b>        |                 |      |                 |      |
| ≤37                          | 20              | 7.6  | 20              | 8.0  |
| >37                          | 243             | 92.4 | 229             | 92.0 |
|                              | <i>M (SD)</i>   |      | <i>M (SD)</i>   |      |
| <b>Geburtsgewicht</b>        | 3442.1 (463.03) |      | 3444.9 (468.70) |      |
| <b>Gestationsalter</b>       | 39.5 (1.39)     |      | 39.5 (1.38)     |      |

*Anmerkungen:* T6 = 4 Monate nach der Geburt; T7 = 16 Monate nach der Geburt; *N* = Anzahl; % = Prozent; *M* = Mittelwert; *SD* = Standardabweichung.

**Tabelle E 2.** Analyse möglicher Zusammenhänge zwischen soziodemografischen, schwangerschafts- und geburtsbezogenen Kontrollvariablen sowie der sozialen Unterstützung und dem Vorliegen von globalen Entwicklungsauffälligkeiten zu T6 mittels logistischer Regressionen ( $N = 263$ )

| Kontrollvariable                               | NES T6 normal    | NES T6 grenzwertig/auffällig | OR (95 % KI)             | p           |
|------------------------------------------------|------------------|------------------------------|--------------------------|-------------|
|                                                | N (%)            | N (%)                        |                          |             |
| Schulbildung ≤10 Jahre                         | 74 (28.1)        | 7 (2.7)                      | 2.06 (0.72-5.88)         | .178        |
| Vollzeit ( $N = 176$ )                         | 100 (56.8)       | 6 (3.4)                      | 4.14 (0.49-35.16)        | .193        |
| Finanzielle Unzufriedenheit                    | 80 (30.4)        | 8 (3.0)                      | 2.40 (0.84-6.85)         | .102        |
| Nicht verheiratet                              | 159 (60.5)       | 7 (2.7)                      | 0.49 (0.17-1.40)         | .181        |
| Nicht mit Partner zusammenlebend ( $N = 167$ ) | 13 (7.8)         | 1 (0.6)                      | 1.89 (0.21-16.87)        | .571        |
| Geschwister                                    | 113 (43.5)       | 8 (3.1)                      | 1.34 (0.47-3.80)         | .588        |
| Schwangerschaft nicht geplant                  | 34 (12.9)        | 1 (0.4)                      | 0.45 (0.06-3.53)         | .447        |
| Schwangerschaft nicht erwünscht                | 8 (3.0)          | 1 (0.4)                      | 2.14 (0.25-18.35)        | .487        |
| Kaiserschnitt/vaginale OP                      | 48 (18.3)        | 5 (1.9)                      | 2.08 (0.68-6.38)         | .199        |
| Jungen                                         | 125 (47.5)       | 7 (2.7)                      | 0.86 (0.30-2.45)         | .779        |
| Frühgeburtlichkeit ≤37 SSW                     | <b>16 (6.1)</b>  | <b>4 (1.5)</b>               | <b>5.27 (1.51-18.43)</b> | <b>.009</b> |
|                                                | <i>M (SD)</i>    | <i>M (SD)</i>                | <i>OR (95 % KI)</i>      | <i>p</i>    |
| Alter der Mutter ( $N = 262$ )                 | 28.10 (4.46)     | 27.40 (4.19)                 | 0.96 (0.86-1.09)         | .552        |
| Anzahl Lebendgeburten                          | 0.55 (0.76)      | 0.67 (0.82)                  | 1.21 (0.64-2.28)         | .558        |
| Geburtsgewicht                                 | 3446.86 (459.59) | 3362.67 (527.73)             | 1.00 (1.00-1.00)         | .493        |
| Gesamtwert F-SozU ( $N = 261$ )                | 4.34 (0.64)      | 4.33 (0.56)                  | 0.99 (0.44-2.27)         | .988        |

*Anmerkungen:* Variablen *Berufstätigkeit* und *nicht mit dem Ehepartner zusammenlebend* wurden aufgrund unbesetzter Zellen aus den logistischen Regressionen ausgeschlossen; T6 = 4 Monate nach der Geburt;  $N$  = Anzahl, % = Prozent; OR = Odds Ratio; 95 % KI = 95 % Konfidenzintervall;  $p$  = Signifikanzwert;  $M$  = Mittelwert;  $SD$  = Standardabweichung; SSW = Schwangerschaftswoche; F-SozU = Fragebogen zur Sozialen Unterstützung.

**Tabelle E 3.** Analyse möglicher Zusammenhänge zwischen soziodemografischen, schwangerschafts- und geburtsbezogenen Kontrollvariablen sowie der sozialen Unterstützung und dem Vorliegen von globalen Entwicklungsauffälligkeiten zu T7 mittels logistischer Regressionen ( $N = 248$ )

| Kontrollvariable                               | NES T7 normal      | NES T7 auffällig   | OR (95 % KI)            | p           |
|------------------------------------------------|--------------------|--------------------|-------------------------|-------------|
|                                                | N (%)              | N (%)              |                         |             |
| Schulbildung ≤10 Jahre                         | 64 (25.8)          | 10 (4.0)           | 0.85 (0.39-1.86)        | .686        |
| Berufstätig ( $N = 203$ )                      | 144 (70.9)         | 23 (11.3)          | 0.99 (0.35-2.81)        | .985        |
| Vollzeit ( $N = 176$ )                         | 86 (51.5)          | 13 (7.8)           | 0.88 (0.36-2.13)        | .772        |
| Finanzielle Unzufriedenheit                    | 72 (29.0)          | 10 (4.0)           | 0.72 (0.33-1.56)        | .399        |
| Nicht verheiratet                              | 129 (52.0)         | 25 (10.1)          | 1.32 (0.63-2.78)        | .458        |
| Nicht mit Partner zusammenlebend ( $N = 155$ ) | 13 (8.4)           | 1 (0.6)            | 0.38 (0.05-3.00)        | .356        |
| Geschwister                                    | 97 (39.1)          | 16 (6.5)           | 0.90 (0.44-1.81)        | .759        |
| Schwangerschaft nicht geplant                  | 27 (10.9)          | 6 (2.4)            | 1.32 (0.50-3.46)        | .573        |
| Schwangerschaft nicht erwünscht                | 6 (2.4)            | 2 (0.8)            | 1.95 (0.38-10.06)       | .424        |
| Kaiserschnitt/vaginale OP                      | 44 (17.7)          | 9 (3.6)            | 1.22 (0.54-2.77)        | .635        |
| Jungen                                         | 106 (42.7)         | 22 (8.9)           | 1.45 (0.72-2.95)        | .302        |
| Frühgeburtlichkeit ≤37 SSW                     | 17 (6.9)           | 2 (0.8)            | 0.65 (0.14-2.95)        | .579        |
|                                                | <i>M (SD)</i>      | <i>M (SD)</i>      | <i>OR (95% KI)</i>      | <i>p</i>    |
| Alter der Mutter ( $N = 247$ )                 | 28.03 (4.56)       | 28.00 (4.20)       | 1.00 (0.92-1.08)        | .967        |
| Anzahl Lebendgeburten                          | 0.52 (0.71)        | 0.59 (0.90)        | 1.15 (0.73-1.81)        | .552        |
| Geburtsgewicht                                 | 3441.81 (448.56)   | 3508.38 (504.64)   | 1.00 (1.00-1.00)        | .413        |
| Gesamtwert F-SozU ( $N = 241$ )                | <b>4.29 (0.61)</b> | <b>4.50 (0.49)</b> | <b>2.00 (0.99-4.02)</b> | <b>.052</b> |

*Anmerkungen:* Variable *nicht mit dem Ehepartner zusammenlebend* wurde aufgrund unbesetzter Zellen aus den logistischen Regressionen ausgeschlossen; T7 = 16 Monate nach der Geburt;  $N$  = Anzahl, % = Prozent; OR = Odds Ratio; 95 % KI = 95 % Konfidenzintervall;  $p$  = Signifikanzwert;  $M$  = Mittelwert;  $SD$  = Standardabweichung; SSW = Schwangerschaftswoche; F-SozU = Fragebogen zur Sozialen Unterstützung.

**Tabelle E 4.** Adjustierte Zusammenhänge zwischen Angst- und/oder depressiven Störung und der kindlichen Entwicklung zu T6 ( $N = 263$ ) und T7 ( $N = 241$ )

|        | keine AD bis T6 ( $N = 82$ )  |                               | reine A bis T6 ( $N = 77$ ) |      | reine D bis T6 ( $N = 34$ )   |                          |             | komorbide AD bis T6 ( $N = 70$ ) |                   |      |
|--------|-------------------------------|-------------------------------|-----------------------------|------|-------------------------------|--------------------------|-------------|----------------------------------|-------------------|------|
|        | grenzw./ auffällig<br>$N$ (%) | grenzw./ auffällig<br>$N$ (%) | $OR$ (95 % $KI$ )           | $p$  | grenzw./ auffällig<br>$N$ (%) | $OR$ (95 % $KI$ )        | $p$         | grenzw./ auffällig<br>$N$ (%)    | $OR$ (95 % $KI$ ) | $p$  |
| GES    | 3 (3.7)                       | 5 (6.5)                       | 2.08 (0.47-9.29)            | .336 | 5 (14.7)                      | 4.30 (0.93-19.85)        | .061        | 2 (2.9)                          | 0.71 (0.11-4.47)  | .712 |
| HBS    | 6 (7.3)                       | 10 (13.0)                     | 1.92 (0.66-5.58)            | .230 | 4 (11.8)                      | 1.66 (0.44-6.31)         | .459        | 9 (12.9)                         | 1.85 (0.62-5.49)  | .269 |
| FMOT   | 9 (11.0)                      | 5 (6.5)                       | 0.58 (0.18-1.82)            | .348 | 7 (20.6)                      | 2.04(0.69-6.05)          | .198        | 15 (21.4)                        | 2.18 (0.89-5.36)  | .090 |
| VISWA  | 7 (8.5)                       | 4 (5.2)                       | 0.63 (0.17-2.25)            | .472 | <b>8 (23.5)</b>               | <b>3.17 (1.03-9.77)</b>  | <b>.045</b> | 5 (7.1)                          | 0.78 (0.23-2.61)  | .686 |
| KOG    | 14 (17.1)                     | 18 (23.4)                     | 1.55 (0.70-3.40)            | .277 | 9 (26.5)                      | 1.68 (0.64-4.41)         | .291        | 11 (15.7)                        | 0.88 (0.37-2.09)  | .767 |
|        | keine bis T7 AD ( $N = 76$ )  |                               | reine A bis T7 ( $N = 70$ ) |      | reine D bis T7 ( $N = 25$ )   |                          |             | komorbide AD bis T7 ( $N = 70$ ) |                   |      |
|        | auffällig<br>$N$ (%)          | auffällig<br>$N$ (%)          | $OR$ (95 % $KI$ )           | $p$  | auffällig<br>$N$ (%)          | $OR$ (95 % $KI$ )        | $p$         | auffällig<br>$N$ (%)             | $OR$ (95 % $KI$ ) | $p$  |
| GES    | 10 (13.2)                     | 11 (15.7)                     | 1.30 (0.51-3.30)            | .585 | 5 (20.0)                      | 1.54 (0.47-5.09)         | .479        | 11 (15.7)                        | 1.50 (0.58-3.86)  | .402 |
| HBS    | 6 (7.9)                       | 8 (11.4)                      | 1.56 (0.51-4.76)            | .433 | <b>7 (28.0)</b>               | <b>4.39 (1.31-14.75)</b> | <b>.017</b> | 11 (15.7)                        | 2.47 (0.84-7.21)  | .099 |
| VISMOT | 3 (3.9)                       | 3 (4.3)                       | 1.12 (0.22-5.74)            | .894 | 1 (4.0)                       | 0.99 (0.10-9.99)         | .992        | 8 (11.4)                         | 3.41 (0.85-13.78) | .085 |
| REZSPR | 5 (6.6)                       | 5 (7.1)                       | 1.10 (0.30-3.97)            | .889 | 3 (12.0)                      | 1.93 (0.43-8.75)         | .393        | 5 (7.1)                          | 1.10 (0.30-4.11)  | .882 |
| EXSPR  | 17 (22.4)                     | 14 (20.0)                     | 0.89 (0.40-1.97)            | .769 | 8 (32.0)                      | 1.60 (0.59-4.36)         | .355        | 15 (21.4)                        | 1.01 (0.45-2.27)  | .972 |
| KOG    | 27 (35.5)                     | 24 (34.3)                     | 0.91 (0.46-1.81)            | .788 | <b>3 (12.0)</b>               | <b>0.25 (0.07-0.92)</b>  | <b>.037</b> | 20 (28.6)                        | 0.65 (0.31-1.34)  | .242 |

Anmerkungen: T6 = 4 Monate nach der Geburt; T7 = 16 Monate nach der Geburt; Keine AD = keine Angst- oder depressive Störung; Reine A = reine Angststörung; Reine D = reine depressive Störung; Komorbide AD = komorbide Angst- und depressive Störung; grenzw. = grenzwertig;  $N$  =

Anzahl, % = Prozent; *OR* = Odds Ratio; 95 % KI = 95 % Konfidenzintervall; *p* = Signifikanzwert; GES = Gesamtwert; HBS = Haltungs- und Bewegungssteuerung; FMOT = Feinmotorik; VISWA = Visuelle Wahrnehmung; KOG = Kognitive Leistungen; VISMOT = Visuomotorik; REZSPR = Rezeptive Sprache; EXSPR = Expressive Sprache
